# Supplementary material
Source: PubMed Central journal article supplement (PMC5059811)
Supplement: supp_tpc.16.00491_TPC2016-00491-RAR1_Supplemental_Material.pdf [file supp_tpc.16.00491_TPC2016-00491-RAR1_Supplemental_Material.pdf]

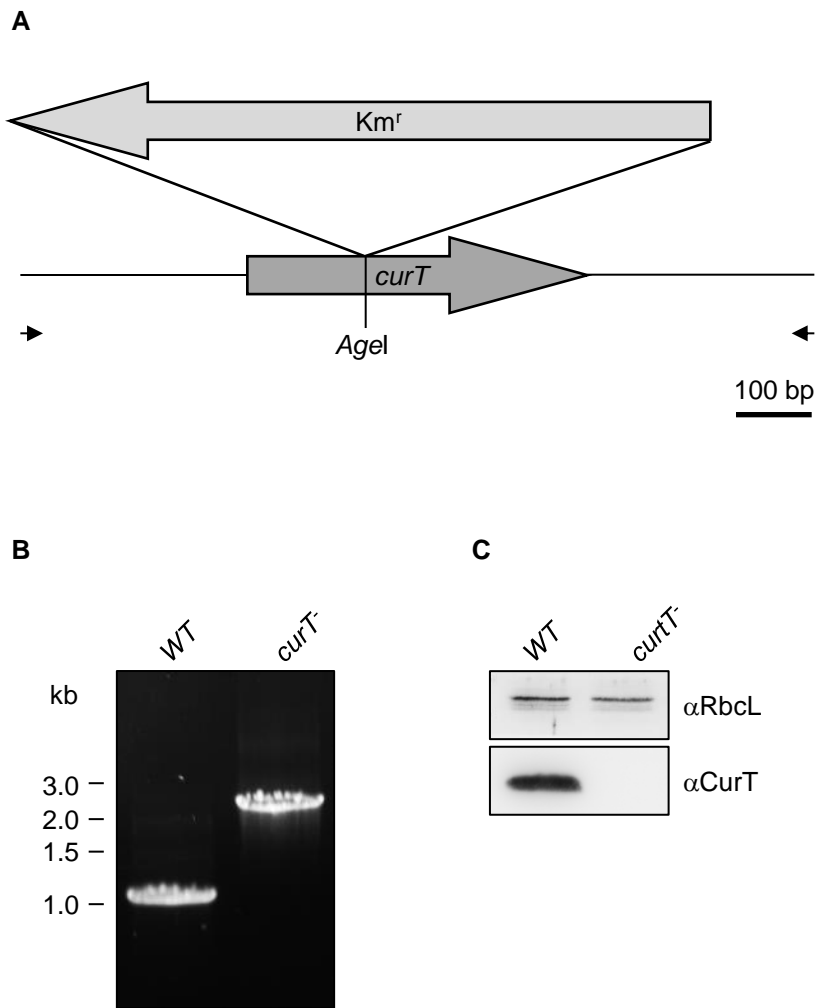

**Supplemental Figure 1.** Construction of the *curT* mutant. **A)** Strategy for inactivation of *curT*. The donor plasmid used to generate CurT-deficient lines is shown schematically, with the kanamycin resistance cassette inserted at the unique *Agel* site in the *curT* coding region. The open arrows indicate transcriptional orientation. Solid arrows mark the positions of primers which were used for the PCR-based segregation analysis of wild-type and *curT* DNA depicted in **B**. **C)** Complete absence of the CurT protein in the mutant was verified by immunoblotting. As a loading control, the RbcL subunit of the Rubisco enzyme was analyzed in parallel.

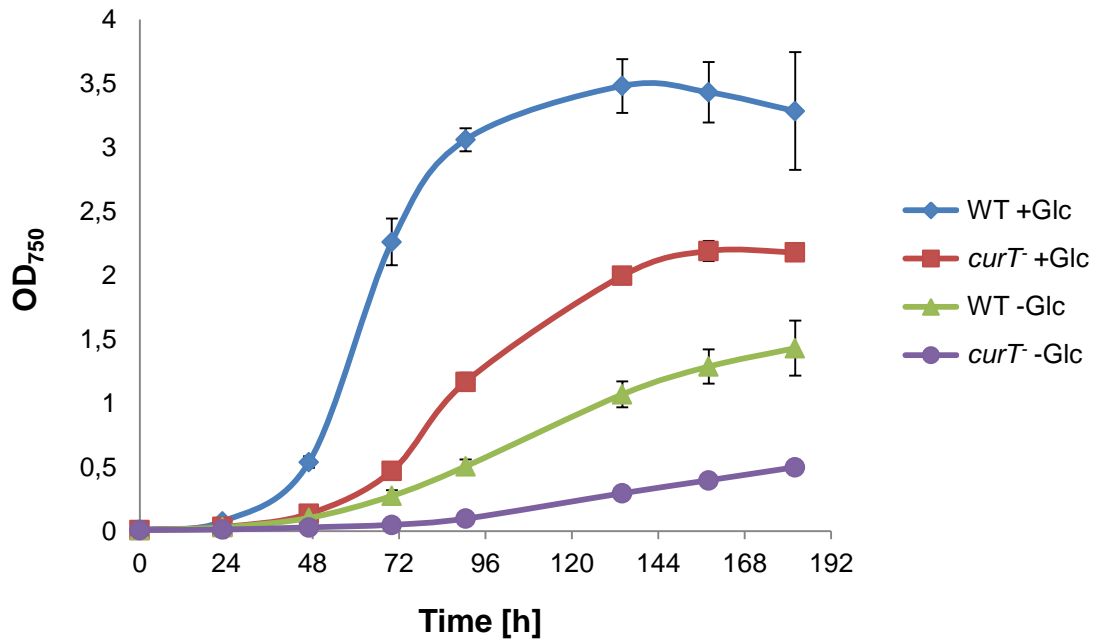

**Supplemental Figure 2.** Growth phenotype of *curT*. Wild-type and *curT* cultures were grown in the presence and absence of glucose at 30 °C. Cultures were inoculated to OD<sub>750</sub>=0.01 and the OD<sub>750</sub> was monitored every day. Data are means ± SD of three independent experiments.

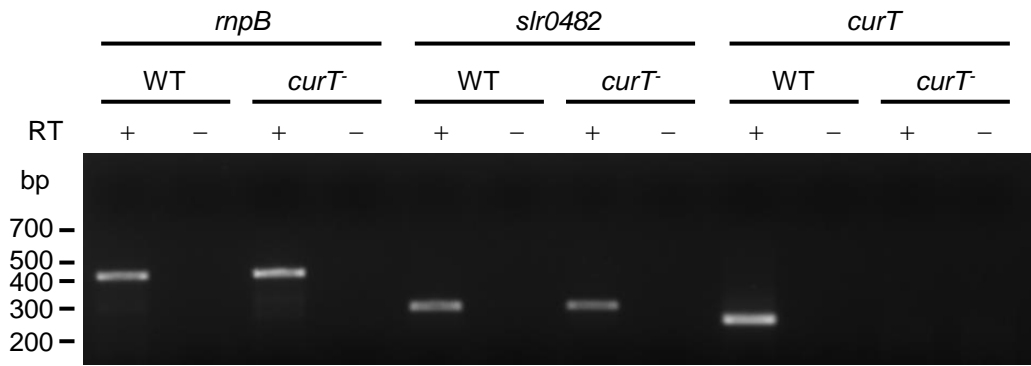

**Supplemental Figure 3.** Expression analysis of the open reading frame *slr0482* (located upstream of *curT*) in the *curT*<sup>-</sup> strain. RT-PCR analysis of mRNAs from wild-type or *curT*<sup>-</sup> cells, performed using primer pairs specific for *rnpB*, *slr0482* or *slr0483* (*curT*). Note that expression of *slr0482* is unaffected by the status of the *curT* locus, and that the *curT*<sup>-</sup> mutant does not express *curT* RNA. A negative control without reverse transcriptase (RT) was performed for each reaction. The expression of *rnpB*, which is the catalytic RNA component of the tRNA-processing Rnase P, served as control (Vioque, 1992).

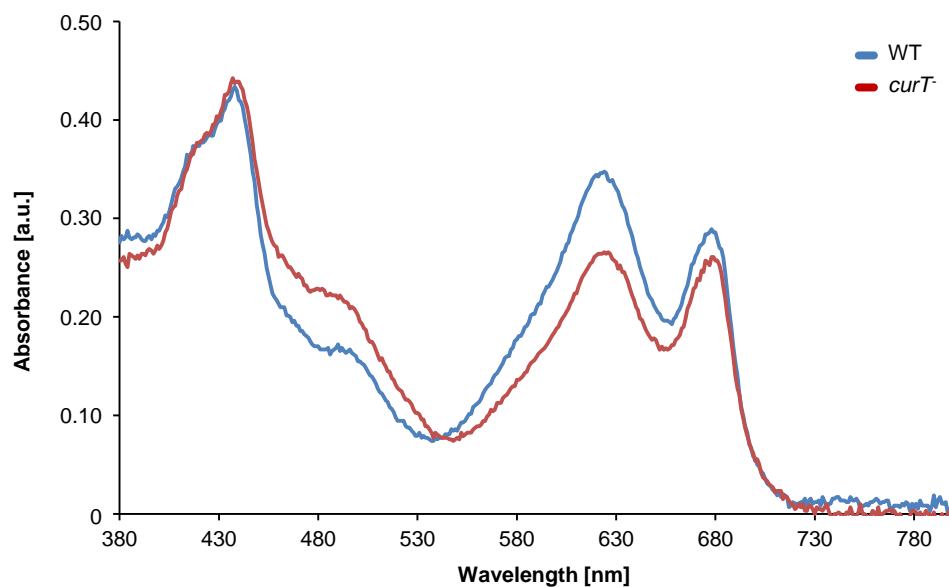

**Supplemental Figure 4.** Absorbance spectra of *curT* and wild-type cells. Spectra were normalized to the  $OD_{750}$ . Cells were grown at  $30 \mu\text{mol photons m}^{-2}\text{s}^{-1}$  in BG11 with 5 mM glucose.

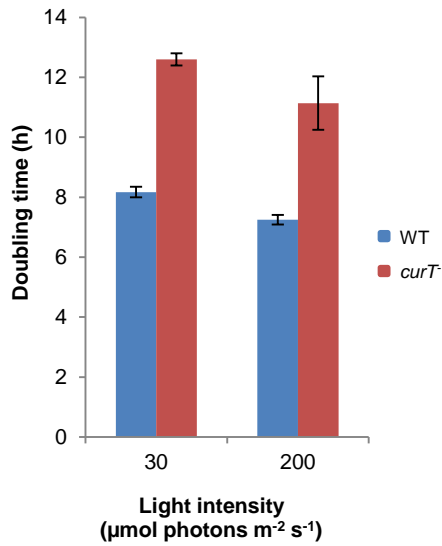

**Supplemental Figure 5.** High-light growth phenotypes of wild-type *Synechocystis* 6803 and the *curT* strain. Cultures of wild-type and *curT* cells were inoculated to  $\text{OD}_{750}=0.01$  and grown in the presence of glucose at 30 °C and 200  $\mu\text{mol photons m}^{-2}\text{s}^{-1}$ . Doubling times were calculated based on the  $\text{OD}_{750}$  after two days. Doubling times are mean  $\pm$  SD of three independent experiments.

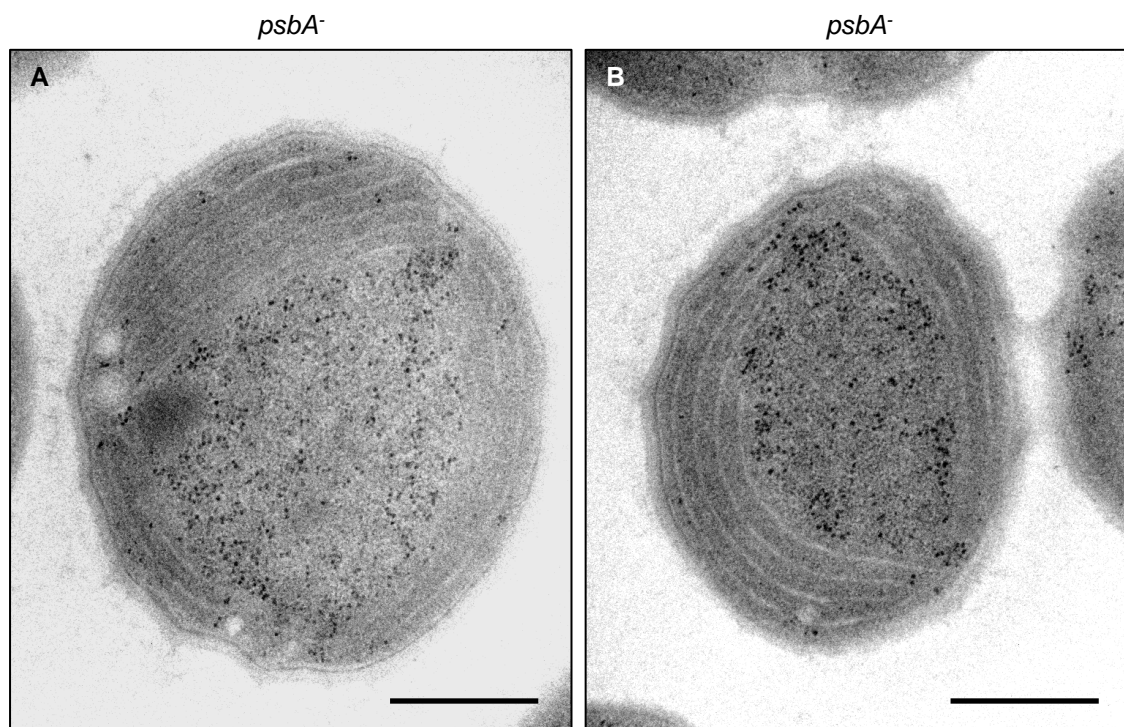

**Supplemental Figure 6.** Ultrastructure of the *TD41* mutant, which lacks the *psbA* transcript and the D1 protein. Scale bar: 500 nm.



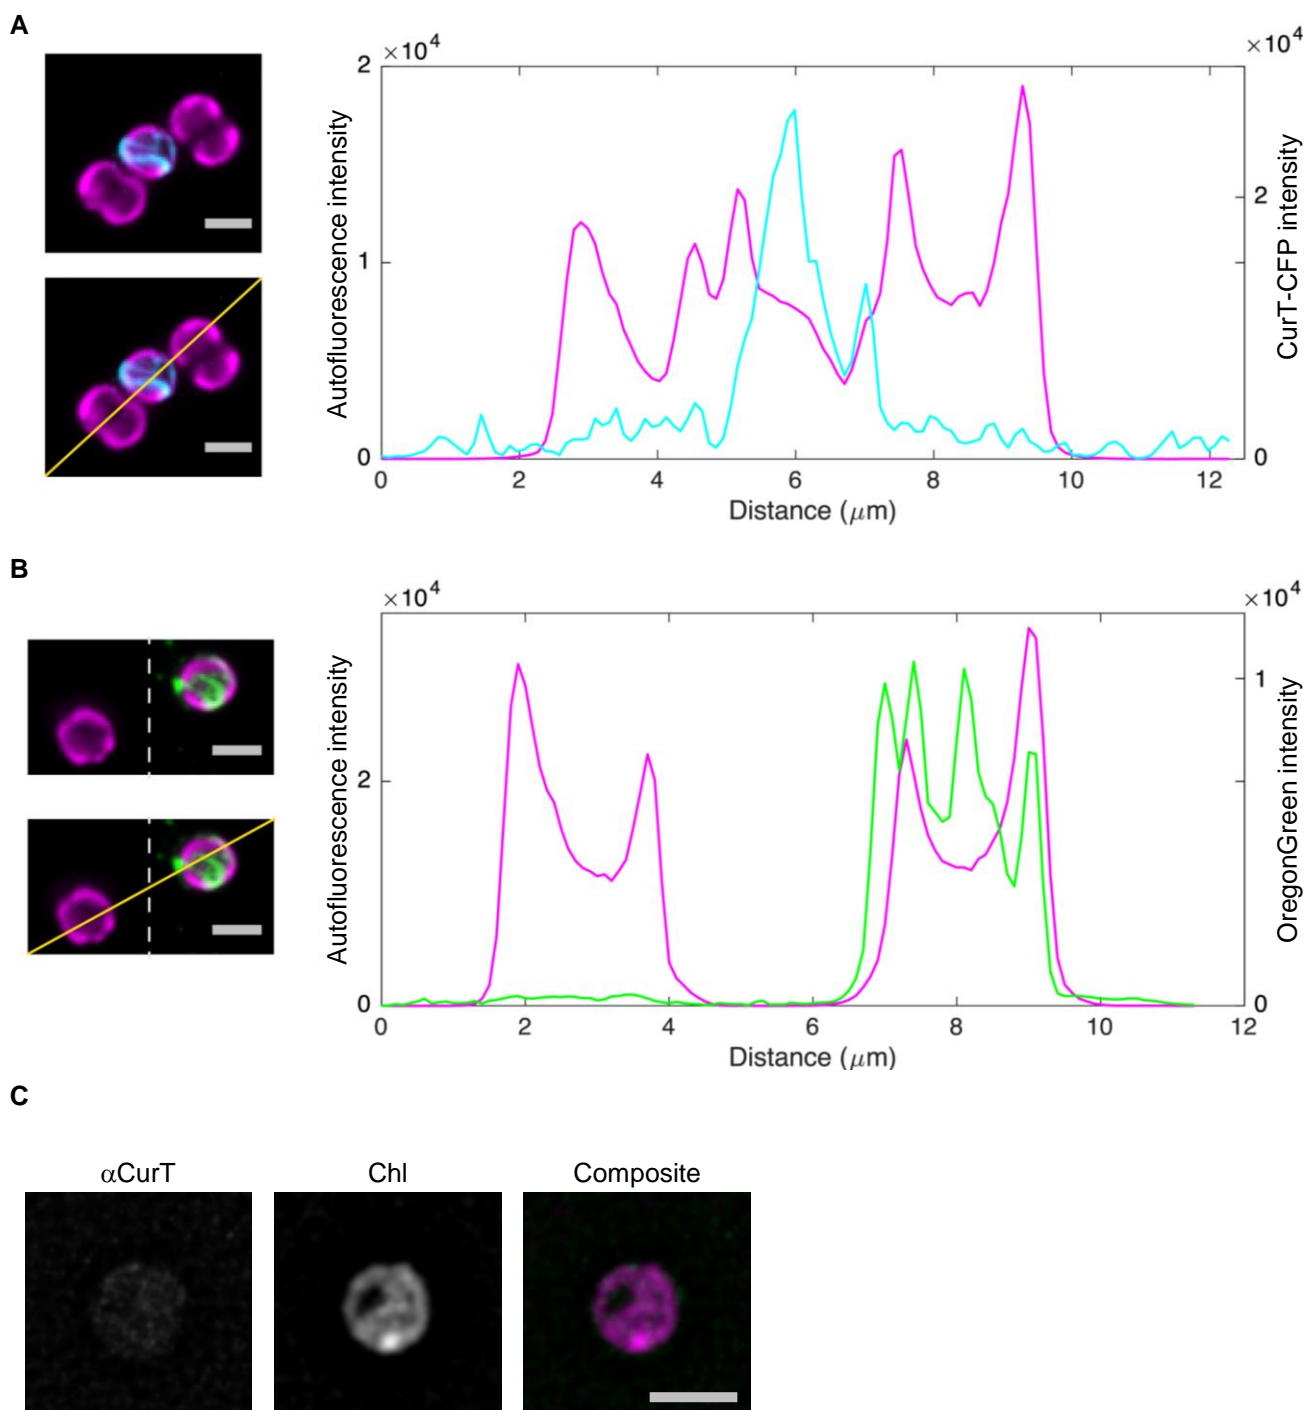

**Supplemental Figure 8.** Localization of CurT and CurT-CFP by fluorescence microscopy. **A)** Wild-type and *curT-CFP* cells were mixed to show the relative intensity of the CurT-CFP signal. Images are maximum projections and were quantified on a diagonal line profile. **B)** Cells treated or not treated with  $\alpha$ CurT as primary antibody were combined in one image. As in **A)** a diagonal line profile traversing both cells shows the intensity of the signal in the imaging channel. **C)** Negative control. Immunofluorescence of *curT* mutant probed with  $\alpha$ CurT antibody. Scale bars: 2  $\mu$ m.



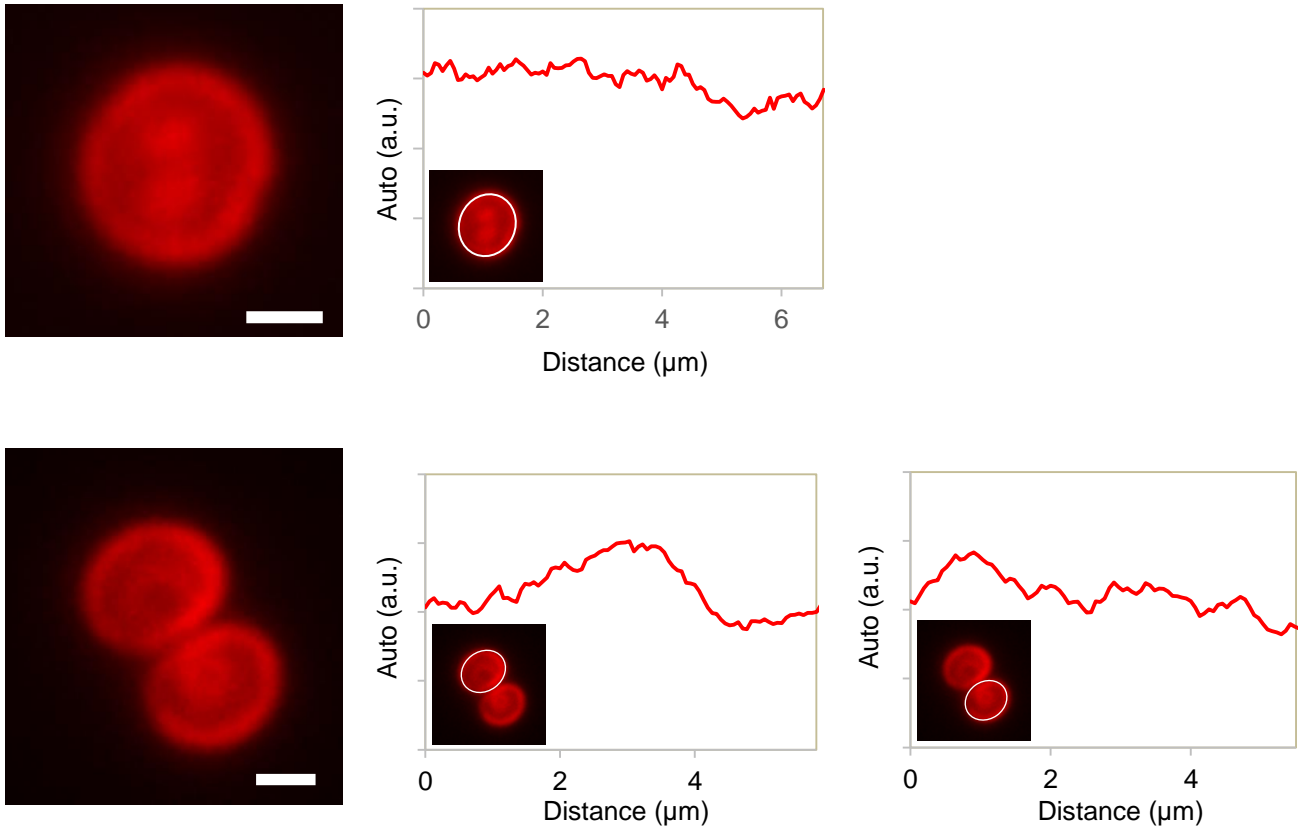

**Supplemental Figure 9. Chlorophyll autofluorescence of *curT*.** For exemplified live-cell imaging of the *curT* mutant, cells were processed exactly as in Figure 8. The chlorophyll autofluorescence is shown in red. Fluorescence intensity profiles of the cell's periphery are depicted on the right. Scale bars: 1 μm.

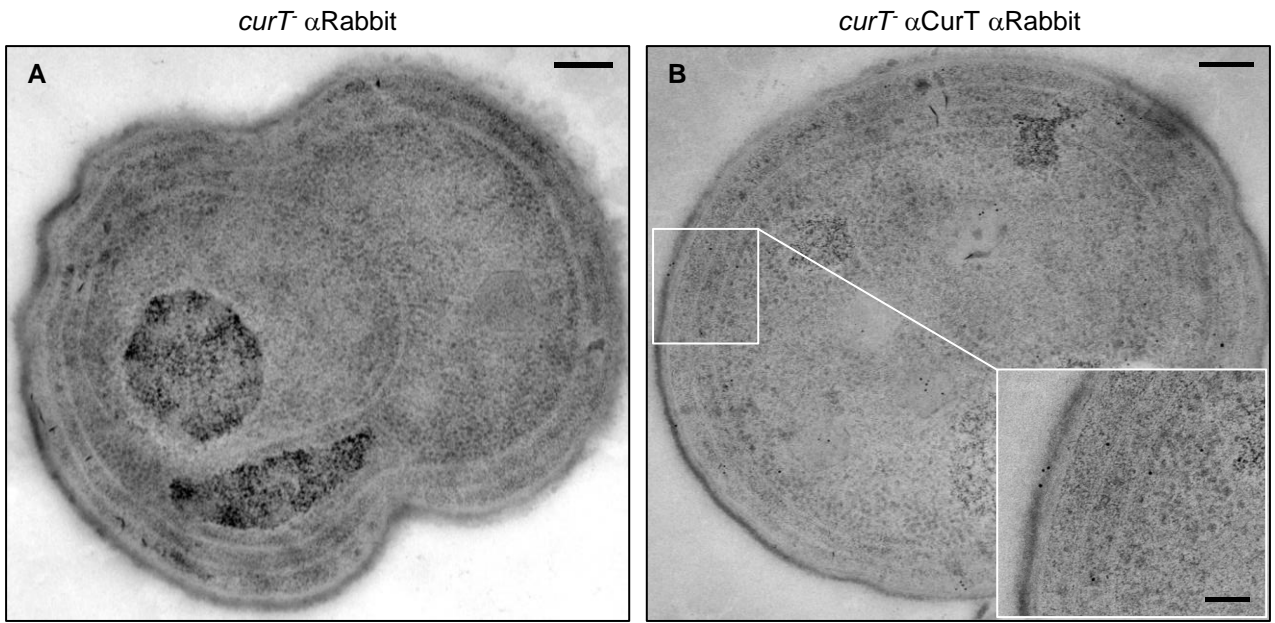

**Supplemental Figure 10.** The *curT* mutant as a negative control for immunogold labeling. Ultrathin sections of *curT* cells that had **(B)** or had not **(A)** been exposed to the primary antibody rabbit  $\alpha$ CurT (1:500) and were then treated with gold-conjugated goat anti-rabbit IgG served as an additional negative control for the subcellular localization of CurT by immunogold labeling. Bars = 200 nm (overview) and 100 nm (details), respectively.

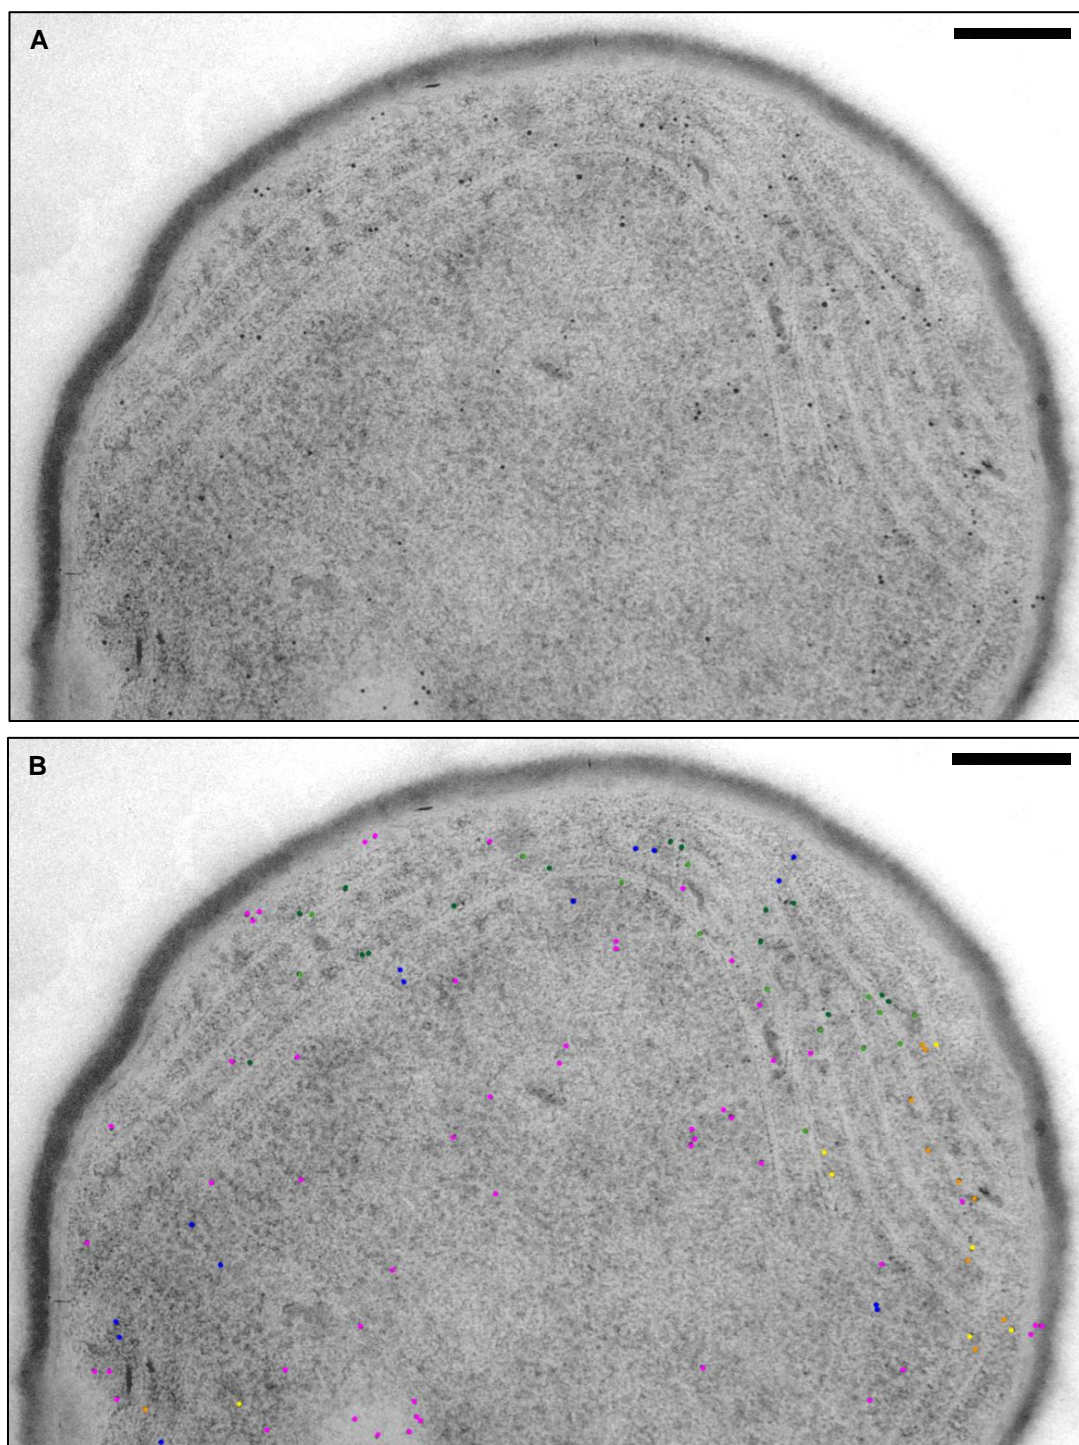

**Supplemental Figure 11.** Representative counts of immunogold signals. **A)** Detailed view of a wild-type ultrathin section labeled with  $\alpha$ CurT (cell from Figure 10B, rotated 90°) and color-coded analysis of the same cell (**B**). The colors highlight the localization of each signal: dark green: convex side of green region; light green: concave side of green region; dark yellow: convex side of yellow region; light yellow: concave side of yellow region; blue: no reliable assignment possible; magenta: not located at thylakoid membrane. Scale bars represent 200 nm.

**Supplemental Table 1.** Overview of immunogold signals in *curT* cells.

|                          | Total number of signals |         | Relative number of signals |         |
|--------------------------|-------------------------|---------|----------------------------|---------|
|                          | convex                  | concave | convex                     | concave |
| Total thylakoid membrane | 185                     | 179     | 50.8                       | 49.2    |

The analysis of the *curT* mutant was performed identically to the wild-type (Supplemental Figure 9) and revealed a total number of 364 signals which are located at the thylakoid membrane in 30 cells. Discrimination between different regions of the thylakoid membrane was not possible in the *curT* mutant, due to the absence of biogenesis centers. Statistical analysis by the  $\chi^2$  test as performed for the wild-type signals (Supplemental Table 3) confirmed a random distribution to the convex and concave side of the thylakoid membrane.

**Supplemental Table 2.** Overview of immunogold signals in specific regions of *Synechocystis* 6803 wild-type cells.

|                          | Total number of signals |         | Relative number of signals |         |
|--------------------------|-------------------------|---------|----------------------------|---------|
|                          | convex                  | concave | convex                     | concave |
| Total thylakoid membrane | 888                     | 696     | 56.1                       | 43.9    |
| Green regions            | 499                     | 413     | 54.7                       | 45.3    |
| Red regions              | 201                     | 163     | 55.2                       | 44.8    |
| Yellow regions           | 188                     | 120     | 61.0                       | 39.0    |

Quantification of immunogold signals after labeling with  $\alpha$ CurT as primary antibody in 95 cells resulted in the total of 1584 signals, which are unambiguously located at the thylakoid membrane and can be assigned to either the convex or the concave side of the thylakoid lamella. The relative numbers of immunogold signals were calculated for total thylakoid membranes and each specific membrane region as shown in Figure 10F and Figure 10G.

**Supplemental Table 3.** Statistical analysis of immunogold signals for wild-type *Synechocystis* 6803 cells.

|                                      | Total TM | Green | Red | Yellow |
|--------------------------------------|----------|-------|-----|--------|
| Deviation from random distribution   | ***      | **    | *   | ***    |
| Deviation from total TM distribution | X        | -     | -   | ***    |
| Deviation from green distribution    | -        | X     | -   | ***    |
| Deviation from red distribution      | -        | -     | X   | *      |
| Deviation from yellow distribution   | ***      | ***   | *   | X      |

The null hypothesis of a random 50:50 distribution was tested for the observed distributions of immunogold signals on the convex and concave sides of the thylakoid membrane in the defined regions (Supplemental Table 2). Each hypothesis was compared pairwise to the entire thylakoid membrane, as well as the different regions, by performing a  $\chi^2$  test (Zöfel, 1988). The asterisks indicate significant differences to the corresponding hypothesis (df = 1) with error probabilities of <5 % (\*), <1 % (\*\*) and 0.1 % (\*\*\*); - no significant difference.

**Supplemental Table 4.** Co-expression of *curT*.

| ORF            | Function                                                                        |
|----------------|---------------------------------------------------------------------------------|
| <i>slr1945</i> | 2,3-bisphosphoglycerate-independent phosphoglycerate mutase, yibO, pgm, slr1945 |
| <i>ssr3451</i> | cytochrome b559 alpha subunit, psbE, ssr3451                                    |
| <i>slr0427</i> | photosystem II manganese-stabilizing polypeptide, psbO                          |
| <i>slr2094</i> | fructose-1,6-/sedoheptulose-1,7-bisphosphatase, fbpl, glpX                      |
| <i>smr0006</i> | cytochrome b559 b subunit, psbF, smr0006                                        |
| <i>slr2073</i> | hypothetical protein YCF50, ycf50, cdv2, sepF                                   |
| <i>smr0007</i> | photosystem II PsbL protein, psbL, smr0007                                      |
| <i>slr0047</i> | hypothetical protein YCF12, ycf12, psb30                                        |
| <i>slr1329</i> | ATP synthase beta subunit, atpD, atpB                                           |
| <i>slr2067</i> | allophycocyanin alpha subunit                                                   |

Co-expression of CurT was examined using the CyanoEXpress 2.2 database (Hernández-Prieto and Futschik, 2012; Hernández-Prieto et al., 2016). The first ten hits in CyanoEXpress 2.2 are listed, which represent the genes whose expression profiles are most similar to that of *curT*.

## Supplemental Methods

### RT-PCR

RNA from *Synechocystis* 6803 wild-type and *curT* cells was isolated using the TRI Reagent (Sigma-Aldrich, Munich, Germany) according to the manufacturer's instructions, and subsequently treated with RQ1 RNase-free DNase (Promega, Mannheim, Germany). Reverse transcription was performed with SuperScript III Polymerase (Invitrogen, Life Technologies GmbH, Darmstadt, Germany) followed by PCR-based cDNA amplification using gene-specific primers for *curT* (RT0483/5: AAG GAT CCG TGG GCC GTA AAC ATT CA; RT0483/3: AAG TCG ACA ATG AGG GGT TGC TTG TT), *slr0482* (RT0482/5: TGG GGG ATG CCT AGT TAT; RT0482/3: CCA GGG CTT TTC CAC TTT) and *rnpB* (RT<sub>rnpB</sub>/5: GAG AGT TAG GGA GGG AGT; RT<sub>rnpB</sub>/3: GAG AGT TAG TCG TAA GCC G).

### Whole cell absorbance spectra

Whole cell absorbance spectra were measured with a Shimadzu UV-2450 UV-VIS spectrophotometer equipped with an ISR-2200 integrating sphere attachment which allows transmittance measurements of turbid samples with less than 0,015 % stray light. Prior to the measurement, cells were washed with BG11 medium and concentrated to an optical density at 750 nm ( $OD_{750}$ ) of about 2 that was determined using a Beckman DU 7400 spectrophotometer. Spectra were normalized to an  $OD_{750}$  value of 1.



## Supplemental References

**Hernandez-Prieto, M. and Futschik, M.E.** (2012) CyanoEXpress: a web database for interactive exploration and visualisation of the integrated transcriptome of cyanobacterium *Synechocystis* sp. PCC6803. *Bioinformatics* **8**, 634-638.

**Hernández-Prieto, M.A., Semeniuk, T.A., Giner-Lamia, J., and Futschik, M.E.** (2016). The Transcriptional Landscape of the Photosynthetic Model Cyanobacterium *Synechocystis* sp. PCC6803. *Scientific Reports* **6**, 22168.

**Tamura, K., Peterson, D., Peterson, N., Stecher, G., Nei, M., and Kumar, S.** (2011). MEGA5: Molecular evolutionary genetics analysis using maximum likelihood, evolutionary distance, and maximum parsimony methods. *Mol Biol Evol* **28**, 2731-2739.

**Vioque, A.** (1992). Analysis of the gene encoding the RNA subunit of ribonuclease P from cyanobacteria. *Nucleic Acids Res* **20**, 6331-6337.

**Zöfel, P.** (1988). *Statistik in der Praxis.* (Stuttgart, Germany: Gustav Fischer Verlag).
